# Supplementary material for: Comparative and Transcriptome Analyses Uncover Key Aspects of Coding- and Long Noncoding RNAs in Flatworm Mitochondrial Genomes
Source: PubMed Central journal article supplement (PMC4856072; doi:10.1534/g3.116.028175), 2016-02-23
Supplement: supp_g3.116.028175_FigureS1.pdf [file supp_g3.116.028175_FigureS1.pdf]

**Figure S1 - Trna figures *S. mediterranea* Sxl**

tRNA secondary structures as predicted by MITOS and RNAfold.

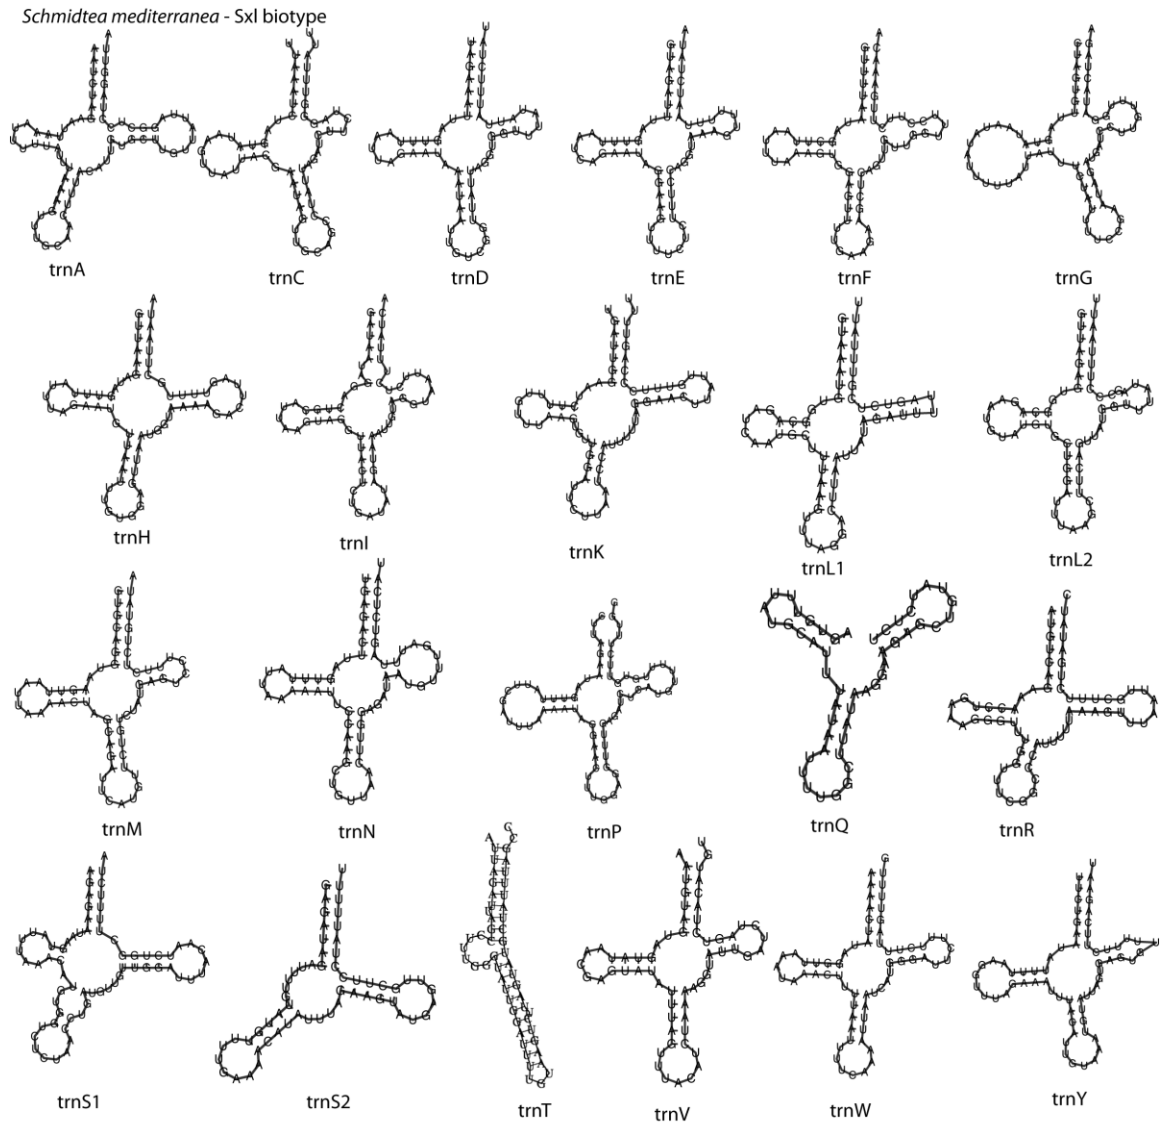

All tRNAs structures from MITOs except for trnT which is from RNAfold
