# Supplementary material for: Comparative and Transcriptome Analyses Uncover Key Aspects of Coding- and Long Noncoding RNAs in Flatworm Mitochondrial Genomes
Source: PubMed Central journal article supplement (PMC4856072; doi:10.1534/g3.116.028175), 2016-02-23
Supplement: supp_g3.116.028175_FigureS2.pdf [file supp_g3.116.028175_FigureS2.pdf]

Figure S2 - Trna figures *S. mediterranea* Asxl

tRNA secondary structures as predicted by MITOS.

*Schmidtea mediterranea* - Asxl biotype

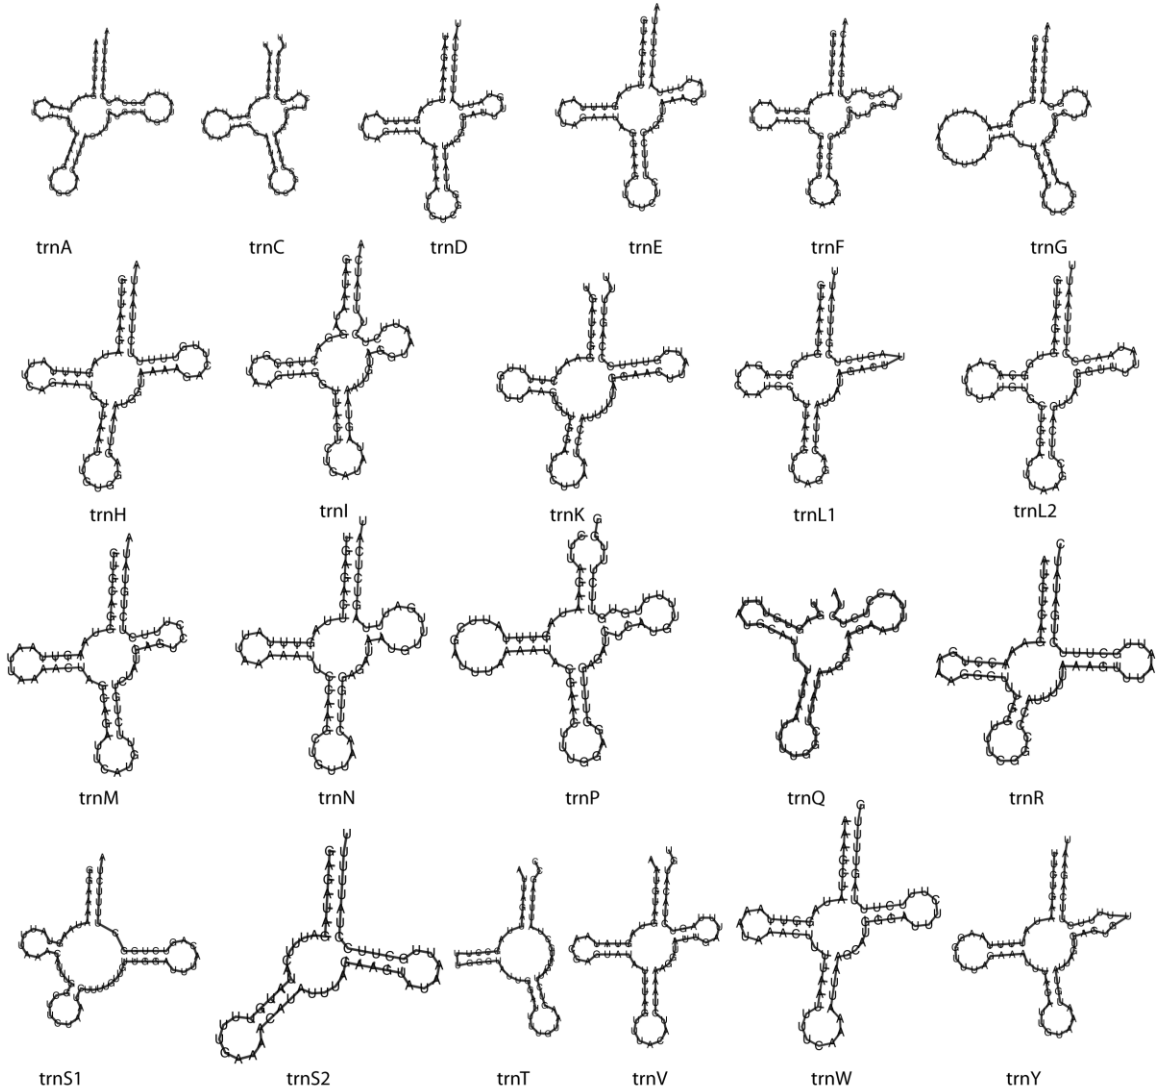

All tRNAs structures from MITOS
