# Supplementary material for: Comparative and Transcriptome Analyses Uncover Key Aspects of Coding- and Long Noncoding RNAs in Flatworm Mitochondrial Genomes
Source: PubMed Central journal article supplement (PMC4856072; doi:10.1534/g3.116.028175), 2016-02-23

**Figure S3 - Trna figures *Girardia* sp.**

tRNA secondary structures as predicted by MITOS.

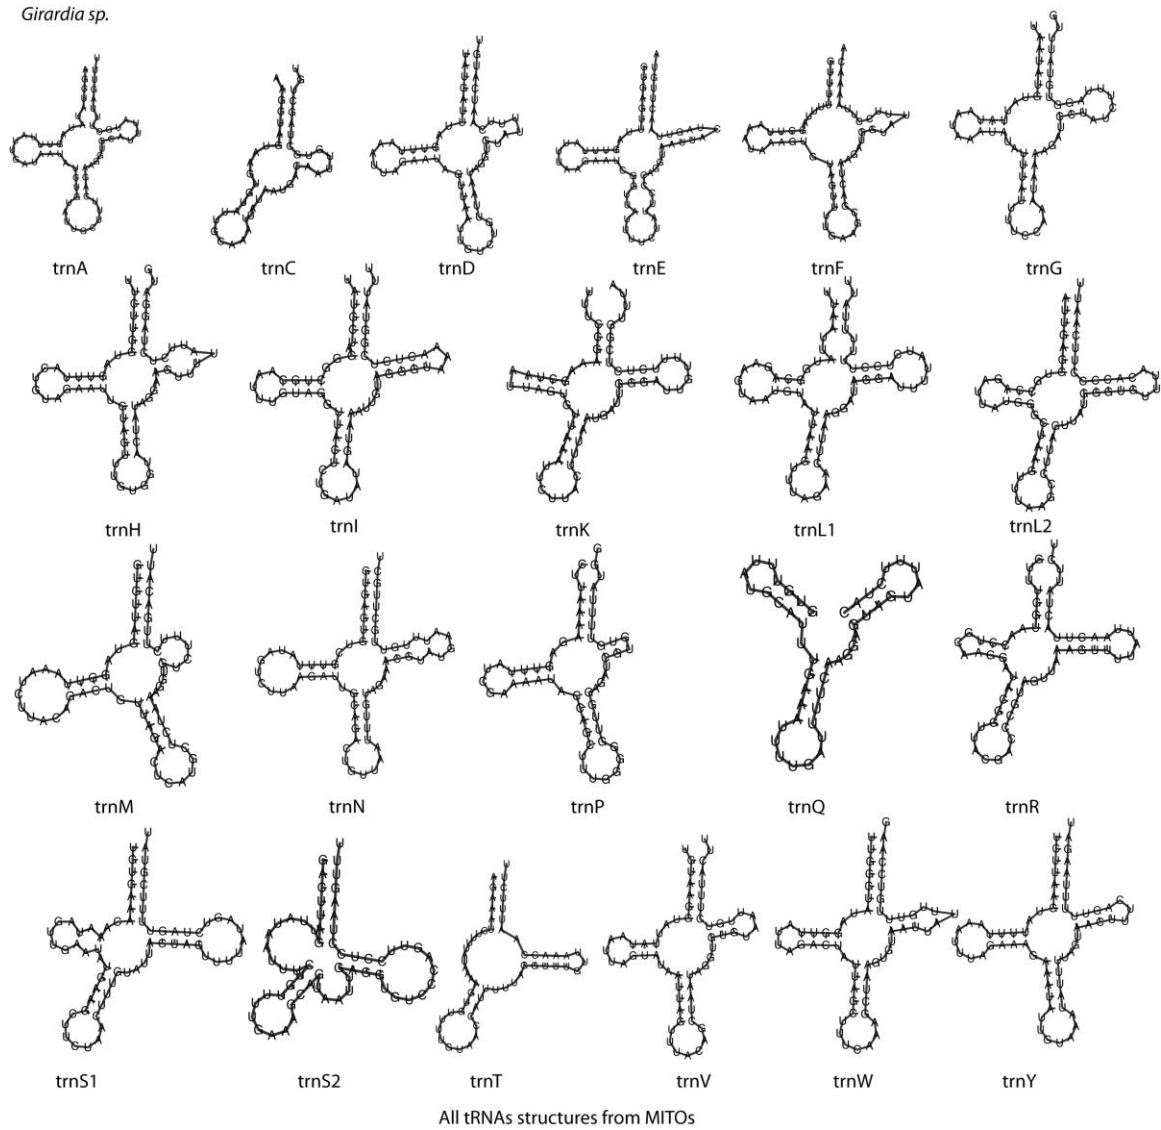

Supplement: supp_g3.116.028175_FigureS3.pdf [file supp_g3.116.028175_FigureS3.pdf]
