# Supplementary material for: Comparative and Transcriptome Analyses Uncover Key Aspects of Coding- and Long Noncoding RNAs in Flatworm Mitochondrial Genomes
Source: PubMed Central journal article supplement (PMC4856072; doi:10.1534/g3.116.028175), 2016-02-23
Supplement: supp_g3.116.028175_FigureS4.pdf [file supp_g3.116.028175_FigureS4.pdf]

**Figure S4 - Trna figures P. gracilis**

tRNA secondary structures as predicted by MITOS.

*Phagocata gracilis*

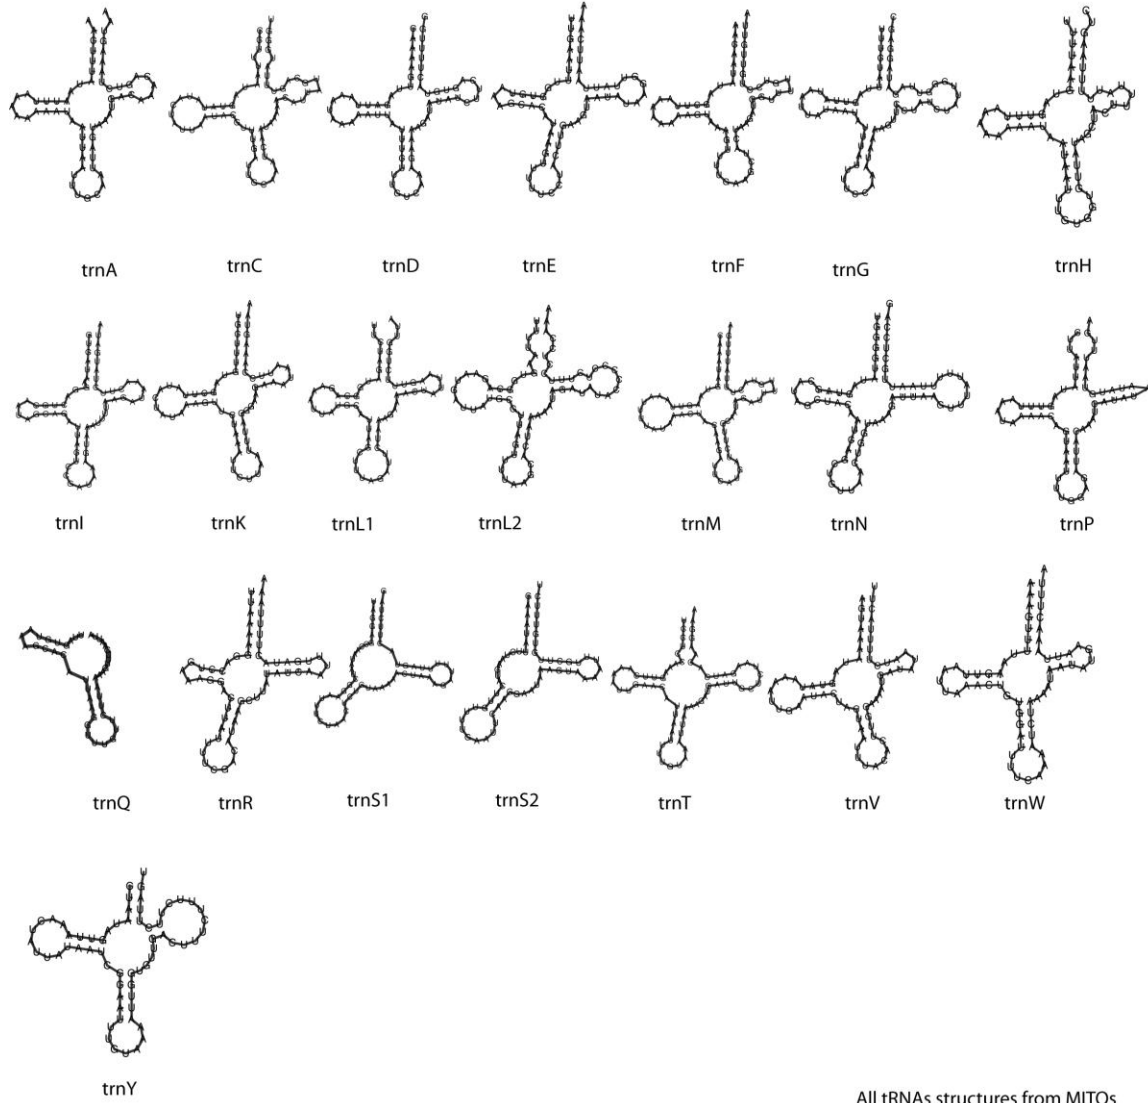

All tRNAs structures from MITOS
