# Supplementary material for: Comparative and Transcriptome Analyses Uncover Key Aspects of Coding- and Long Noncoding RNAs in Flatworm Mitochondrial Genomes
Source: PubMed Central journal article supplement (PMC4856072; doi:10.1534/g3.116.028175), 2016-02-23
Supplement: supp_g3.116.028175_TableS1.pdf [file supp_g3.116.028175_TableS1.pdf]

**Table S1 – SmedSxl Feature Table**

| Name       | Start | Stop  | Length | Distance | Putative Start Codon |
|------------|-------|-------|--------|----------|----------------------|
| COX1       | 427   | 2247  | 1821   | 427      | ttg                  |
| trnE(ttc)  | 2336  | 2397  | 62     | 89       |                      |
| ND6        | 2408  | 2854  | 447    | 11       | atg                  |
| ND5        | 2848  | 4446  | 1599   | -6       | ttg                  |
| trnS2(tga) | 4450  | 4508  | 59     | 4        |                      |
| trnD(gtc)  | 4509  | 4570  | 62     | 1        |                      |
| trnR(tcg)  | 4569  | 4632  | 64     | -1       |                      |
| COX3       | 4653  | 5456  | 804    | 21       | ttg                  |
| trnI(gat)  | 5452  | 5515  | 64     | -4       |                      |
| trnQ(ttg)  | 5524  | 5572  | 49     | 9        |                      |
| trnK(ctt)  | 5574  | 5642  | 69     | 2        |                      |
| ATP6       | 5646  | 6281  | 636    | 4        | atg                  |
| trnV(tac)  | 6283  | 6345  | 63     | 2        |                      |
| ND1        | 6342  | 7232  | 891    | -3       | atg                  |
| trnW(tca)  | 7236  | 7300  | 65     | 4        |                      |
| COX2       | 7301  | 8179  | 879    | 1        | ttg                  |
| trnP(tgg)  | 8283  | 8353  | 71     | 104      |                      |
| ND3        | 8354  | 8707  | 354    | 1        | ttg                  |
| trnA(tgc)  | 8712  | 8780  | 69     | 5        |                      |
| ND2        | 8781  | 9728  | 948    | 1        | ttg                  |
| ?          | 9728  | 10228 | 501    | 0        | atg                  |
| trnS1(tct) | 13897 | 13963 | 67     | 3669     |                      |
| trnM(cat)  | 21440 | 21502 | 63     | 7477     |                      |
| trnH(gtg)  | 21505 | 21571 | 67     | 3        |                      |
| trnF(gaa)  | 21575 | 21640 | 66     | 4        |                      |
| rrnS       | 21642 | 22348 | 707    | 2        |                      |
| trnL1(tag) | 22350 | 22412 | 63     | 2        |                      |
| trnY(gta)  | 22418 | 22483 | 66     | 6        |                      |
| trnG(tcc)  | 22489 | 22557 | 69     | 6        |                      |
| rrnL       | 22558 | 23472 | 915    | 1        |                      |
| trnL2(taa) | 23473 | 23535 | 63     | 1        |                      |
| trnT(tgt)  | 23536 | 23589 | 54     | 1        |                      |
| trnC(gca)  | 23604 | 23663 | 60     | 15       |                      |
| trnN(gtt)  | 23673 | 23736 | 64     | 10       |                      |
| CYTB       | 24452 | 25546 | 1095   | 716      | ttg                  |
| ND4L       | 25513 | 25806 | 294    | -33      | atg                  |
| ND4        | 25757 | 27133 | 1377   | -49      | atg                  |
