# Supplementary material for: Comparative and Transcriptome Analyses Uncover Key Aspects of Coding- and Long Noncoding RNAs in Flatworm Mitochondrial Genomes
Source: PubMed Central journal article supplement (PMC4856072; doi:10.1534/g3.116.028175), 2016-02-23
Supplement: supp_g3.116.028175_TableS2.pdf [file supp_g3.116.028175_TableS2.pdf]

**Table S2 – SmedAsxl Feature Table**

| Name       | Start | Stop  | Length | Distance | Putative Start Codon |
|------------|-------|-------|--------|----------|----------------------|
| COX1       | 428   | 2248  | 1821   | 427      | ttg                  |
| trnE(ttc)  | 2337  | 2398  | 62     | 89       |                      |
| ND6        | 2409  | 2855  | 447    | 11       | atg                  |
| ND5        | 2849  | 4443  | 1595   | -6       | ttg                  |
| trnS2(tga) | 4450  | 4507  | 58     | 7        |                      |
| trnD(gtc)  | 4508  | 4569  | 62     | 1        |                      |
| trnR(tcg)  | 4568  | 4631  | 64     | -1       |                      |
| COX3       | 4652  | 5455  | 804    | 21       | ttg                  |
| trnI(gat)  | 5451  | 5514  | 64     | -4       |                      |
| trnQ(ttg)  | 5521  | 5573  | 53     | 7        |                      |
| trnK(ctt)  | 5574  | 5642  | 69     | 1        |                      |
| ATP6       | 5643  | 6281  | 639    | 1        | atg                  |
| trnV(tac)  | 6283  | 6345  | 63     | 2        |                      |
| ND1        | 6342  | 7232  | 891    | -3       | atg                  |
| trnW(tca)  | 7236  | 7301  | 66     | 4        |                      |
| COX2       | 7302  | 8180  | 879    | 1        | ttg                  |
| trnP(tgg)  | 8279  | 8349  | 71     | 99       |                      |
| ND3        | 8350  | 8703  | 354    | 1        | ttg                  |
| trnA(tgc)  | 8708  | 8776  | 69     | 5        |                      |
| ND2        | 8777  | 9724  | 948    | 1        | ttg                  |
| ?          | 9725  | 10225 | 501    | 1        | ttg                  |
| trnM(cat)  | 11474 | 11536 | 63     | 1249     |                      |
| trnH(gtg)  | 11541 | 11606 | 66     | 5        |                      |
| trnF(gaa)  | 11610 | 11675 | 66     | 4        |                      |
| rrnS       | 11676 | 12384 | 709    | 1        |                      |
| trnL1(tag) | 12385 | 12446 | 62     | 1        |                      |
| trnY(gta)  | 12452 | 12517 | 66     | 6        |                      |
| trnG(tcc)  | 12523 | 12591 | 69     | 6        |                      |
| rrnL       | 12592 | 13506 | 915    | 1        |                      |
| trnL2(taa) | 13507 | 13570 | 64     | 1        |                      |
| trnT(tgt)  | 13571 | 13624 | 54     | 1        |                      |
| trnC(gca)  | 13639 | 13698 | 60     | 15       |                      |
| trnN(gtt)  | 13707 | 13770 | 64     | 9        |                      |
| trnS1(tct) | 14409 | 14475 | 67     | 639      |                      |
| CYTB       | 14497 | 15591 | 1095   | 22       | ttg                  |
| ND4L       | 15558 | 15851 | 294    | -33      | atg                  |
| ND4        | 15802 | 17178 | 1377   | -49      | atg                  |
