# Supplementary material for: Comparative and Transcriptome Analyses Uncover Key Aspects of Coding- and Long Noncoding RNAs in Flatworm Mitochondrial Genomes
Source: PubMed Central journal article supplement (PMC4856072; doi:10.1534/g3.116.028175), 2016-02-23
Supplement: supp_g3.116.028175_TableS3.pdf [file supp_g3.116.028175_TableS3.pdf]

**Table S3 – *Girardia* sp. Feature Table**

| Name       | Start | Stop  | Length | Distance | Putative Start Codon |
|------------|-------|-------|--------|----------|----------------------|
| trnC(gca)  | 97    | 135   | 39     | 263      |                      |
| trnN(gtt)  | 693   | 762   | 70     | 558      |                      |
| CYTB       | 762   | 1892  | 1131   | 0        | ttg                  |
| ND4L       | 1853  | 2146  | 294    | -39      | ttg                  |
| ND4        | 2115  | 3464  | 1350   | -31      | atg                  |
| COX1       | 3490  | 5304  | 1815   | 26       | atg                  |
| trnE(ttc)  | 5311  | 5374  | 64     | 7        |                      |
| ND6        | 5414  | 5845  | 432    | 40       | ttg                  |
| ND5        | 5845  | 7422  | 1578   | 0        | atg                  |
| trnS2(tga) | 7527  | 7588  | 62     | 105      |                      |
| trnD(gtc)  | 7589  | 7649  | 61     | 1        |                      |
| trnR(acg)  | 7648  | 7710  | 63     | -1       |                      |
| COX3       | 7774  | 8565  | 792    | 64       | ttg                  |
| trnI(gat)  | 8572  | 8638  | 67     | 7        |                      |
| trnQ(ttg)  | 8646  | 8692  | 47     | 8        |                      |
| trnK(ctt)  | 8695  | 8758  | 64     | 3        |                      |
| ATP6       | 8775  | 9404  | 630    | 17       | atg                  |
| trnV(tac)  | 9400  | 9461  | 62     | -4       |                      |
| ND1        | 9461  | 10348 | 888    | 0        | ttg                  |
| trnW(tca)  | 10362 | 10423 | 62     | 14       |                      |
| COX2       | 10424 | 11593 | 1170   | 1        | ttg                  |
| trnP(tgg)  | 11589 | 11646 | 58     | -4       |                      |
| ND3        | 11686 | 11991 | 306    | 40       | ttg                  |
| trnA(tgc)  | 11993 | 12054 | 62     | 2        |                      |
| ND2        | 12058 | 12984 | 927    | 4        | ttg                  |
| ?          | 13024 | 13389 | 366    | 40       | atg                  |
| trnM(cat)  | 13466 | 13529 | 64     | 77       |                      |
| trnH(gtg)  | 13670 | 13733 | 64     | 141      |                      |
| trnF(gaa)  | 13739 | 13799 | 61     | 6        |                      |
| rrnS       | 13794 | 14514 | 721    | -5       |                      |
| trnL1(tag) | 14507 | 14573 | 67     | -7       |                      |
| trnY(gta)  | 14573 | 14637 | 65     | 0        |                      |
| trnG(tcc)  | 14640 | 14703 | 64     | 3        |                      |
| trnS1(tct) | 14702 | 14770 | 69     | -1       |                      |
| rrnL       | 14771 | 15663 | 893    | 1        |                      |
| trnL2(taa) | 15664 | 15727 | 64     | 1        |                      |
| trnT(tgt)  | 15728 | 15785 | 58     | 1        |                      |
