# Supplementary material for: Comparative and Transcriptome Analyses Uncover Key Aspects of Coding- and Long Noncoding RNAs in Flatworm Mitochondrial Genomes
Source: PubMed Central journal article supplement (PMC4856072; doi:10.1534/g3.116.028175), 2016-02-23
Supplement: supp_g3.116.028175_TableS4.pdf [file supp_g3.116.028175_TableS4.pdf]

**Table S4 – P. gracilis Feature Table**

| <b>Name</b> | <b>Start</b> | <b>Stop</b> | <b>Length</b> | <b>Distance</b> | <b>Putative Start Codon</b> |
|-------------|--------------|-------------|---------------|-----------------|-----------------------------|
| trnC(gca)   | 2449         | 2516        | 68            | 3726            |                             |
| rrnS        | 2517         | 3178        | 662           | 1               |                             |
| trnL1(tag)  | 3172         | 3225        | 54            | -6              |                             |
| trnY(gta)   | 3226         | 3298        | 73            | 1               |                             |
| trnG(tcc)   | 3299         | 3368        | 70            | 1               |                             |
| trnS1(tct)  | 3362         | 3421        | 60            | -6              |                             |
| rrnL        | 3422         | 4320        | 899           | 1               |                             |
| trnL2(taa)  | 4321         | 4391        | 71            | 1               |                             |
| trnT(tgt)   | 4383         | 4451        | 69            | -8              |                             |
| trnN(gtt)   | 4453         | 4522        | 70            | 2               |                             |
| CYTB        | 4514         | 5668        | 1155          | -8              | ttg                         |
| ND4L        | 5622         | 5870        | 249           | -46             | atg                         |
| ND4         | 5875         | 7200        | 1326          | 5               | ttg                         |
| trnM(cat)   | 7208         | 7276        | 69            | 8               |                             |
| trnH(gtg)   | 7364         | 7425        | 62            | 88              |                             |
| trnF(gaa)   | 7429         | 7491        | 63            | 4               |                             |
| COX1        | 7493         | 9595        | 2103          | 2               | atg                         |
| trnE(ttc)   | 9547         | 9610        | 64            | -48             |                             |
| ND6         | 9611         | 10060       | 450           | 1               | atg                         |
| unknown-3   | 10126        | 10476       | 351           | 66              | ttg                         |
| unknown-2   | 10491        | 10871       | 381           | 15              | ttg                         |
| ND5         | 11120        | 12379       | 1260          | 249             | atg                         |
| trnS2(tga)  | 12403        | 12462       | 60            | 24              |                             |
| trnD(gtc)   | 12472        | 12538       | 67            | 10              |                             |
| trnR(tcg)   | 12539        | 12599       | 61            | 1               |                             |
| COX3        | 12600        | 13437       | 838           | 1               | atg                         |
| trnI(gat)   | 13438        | 13501       | 64            | 1               |                             |
| trnQ(ttg)   | 13502        | 13555       | 54            | 1               |                             |
| trnK(ctt)   | 13556        | 13620       | 65            | 1               |                             |
| ATP6        | 13621        | 14193       | 573           | 1               |                             |
| trnV(tac)   | 14179        | 14242       | 64            | -14             |                             |
| ND1         | 14291        | 15127       | 837           | 49              | atg                         |
| trnW(tca)   | 15126        | 15187       | 62            | -1              |                             |
| COX2        | 15188        | 16081       | 894           | 1               | atg                         |
| trnP(tgg)   | 16083        | 16145       | 63            | 2               |                             |
| ND3         | 16146        | 16457       | 312           | 1               | atg                         |
| trnA(tgc)   | 16458        | 16520       | 63            | 1               |                             |
| ND2         | 16523        | 17482       | 960           | 3               | ttg                         |
| unknown-1   | 17794        | 18122       | 329           | 312             | tta                         |
