# Supplementary material for: Comparative and Transcriptome Analyses Uncover Key Aspects of Coding- and Long Noncoding RNAs in Flatworm Mitochondrial Genomes
Source: PubMed Central journal article supplement (PMC4856072; doi:10.1534/g3.116.028175), 2016-02-23
Supplement: supp_g3.116.028175_TableS5.pdf [file supp_g3.116.028175_TableS5.pdf]

**Table S5 - Primers for PCR and sequencing of key regions of the *S. mediterranea* mitochondrial genome.**

| Gel              | Lane | Fwd Primer                       | Rev Primer                         | Start | Stop  | predicted insert | size from gel |
|------------------|------|----------------------------------|------------------------------------|-------|-------|------------------|---------------|
| SmedSxl          | 1    | cgtgagtcctcagtcgtgtatgagtggtgg   | acaatccacaacagactgaagaaaaacc       | 8456  | 10172 | 1716             | ~1.7kb        |
| SmedSxl          | 2    | cgatttaaaatacgaactttggaggtttgag  | ggttgtttatatgacgataataaactcgacc    | 8299  | 9989  | 1690             | ~1.6kb        |
| SmedSxl          | 3    | ggatggtgagttgtgtttgtattacagatgcc | ctttaacaatcaagaaccaaaacaaaagacc    | 8560  | 9865  | 1305             | ~1.3kb        |
| SmedSxl          | 4    | gtgtttgggtttgattagagtattttaaagg  | ccaaaaagaattagaagtatgaaccattaagc   | 8657  | 9754  | 1097             | ~1.1kb        |
| SmedSxl          | 5    | ggtttttcttcagtcgtgttggtgattg     | caacaacatcaggttagagaccac           | 10143 | 13941 | 3798             | ~5kb          |
| SmedSxl          | 6    | ggtcttttggttggtttcttgattgttaaag  | caacaacatcaggttagagaccac           | 9834  | 13941 | 4107             | ~6kb          |
| SmedSxl          | 7    | atgttttccacacttctccctgtctc       | catagcaatacaaaagtgaaccgcagaagctggc | 13132 | 21843 | 8711             | >12kb         |
| SmedSxl          | 8    | atgttttccacacttctccctgtctc       | ctcaaaagaagcggcgaaacgaaagcggc      | 13132 | 21348 | 8216             | >12kb         |
|                  |      |                                  |                                    |       |       |                  |               |
| SmedAsxl         | 1    | gtctgtttatgagtggtggtttgattctaagg | ggaaaacctgtgagagtcacatacaatacc     | 8461  | 9484  | 1023             | ~1kb          |
| SmedAsxl         | 2    | ggttggattttgggttacaataggtttcg    | cagcactaaagtcaaaaccaagtacataaccc   | 8421  | 9371  | 950              | ~1kb          |
| SmedAsxl         | 3    | ggatggtgagttgtgtttgtattacagatgcc | ggaaaacctgtgagagtcacatacaatacc     | 8554  | 9484  | 930              | ~1kb          |
| SmedAsxl         | 4    | gcaactttacattgtcctgttattagctcc   | cagcactaaagtcaaaaccaagtacataaccc   | 8736  | 9340  | 604              | ~.6kb         |
| SmedAsxl         | 5    | gtctgtttatgagtggtggtttgattctaagg | gctaccttctgacagtcaggactactgcagc    | 8461  | 13958 | 5497             | ~5.5kb        |
| SmedSxl specific | Sxl  | atgttttccacacttctccctgtctc       | caacaacatcaggttagagaccac           | 13132 | 13941 | 809              | ~.8kb         |
| SmedSxl specific | Asxl | atgttttccacacttctccctgtctc       | caacaacatcaggttagagaccac           | na    | na    | 0                | 0             |
